# Supplementary material
Source: publisher site journal article supplement (https://www.dovepress.com/article/607741)
Supplement: Supplementary file 1 [file Supplementary%20Table%20S1.docx]

**Supplementary Table S1. Search threads**

| **Search thread** | **Focus** | **Search string** |
| --- | --- | --- |
| **Thread 1** | Cervical cancer and HPV epidemiology | ("cervical cancer" OR "uterine cervical neoplasms") AND ("human papillomavirus" OR HPV OR "high-risk HPV" OR hrHPV) AND ("epidemiology" OR "incidence" OR "prevalence" OR "natural history") |
| **Thread 2** | Screening modalities | ("cervical cancer screening" OR "mass screening" OR "early detection") AND ("HPV testing" OR "primary HPV screening" OR "HPV DNA testing" OR "HPV genotyping" OR cytology OR "Pap test" OR "Papanicolaou test" OR "liquid-based cytology" OR VIA OR "visual inspection with acetic acid") |
| **Thread 3** | HPV self-sampling | ("HPV self-sampling" OR "self-sampling" OR "self-collection") AND ("HPV testing" OR "HPV DNA") AND ("acceptability" OR "uptake" OR "participation" OR "diagnostic accuracy" OR "sensitivity" OR "specificity") |
| **Thread 4** | Prevention, vaccination and implementation | ("HPV vaccination" OR "papillomavirus vaccines") AND ("cervical cancer prevention") AND ("guidelines" OR "screening programs" OR "coverage" OR "implementation" OR "healthcare access") |
